# Supplementary material for: Symptom Burden and Time from Symptom Onset to Cancer Diagnosis in Patients with Early-Onset Colorectal Cancer: A Multicenter Retrospective Analysis
Source: MDPI journal article supplement (doi:10.3390/curroncol31040158), 2024-04-08
Supplement: s1 [file s1]

**Figure S1. Consort diagram of subset cohort of patients younger than 50 (EoCRC) and 50 years or older (LoCRC) with colorectal cancer.**

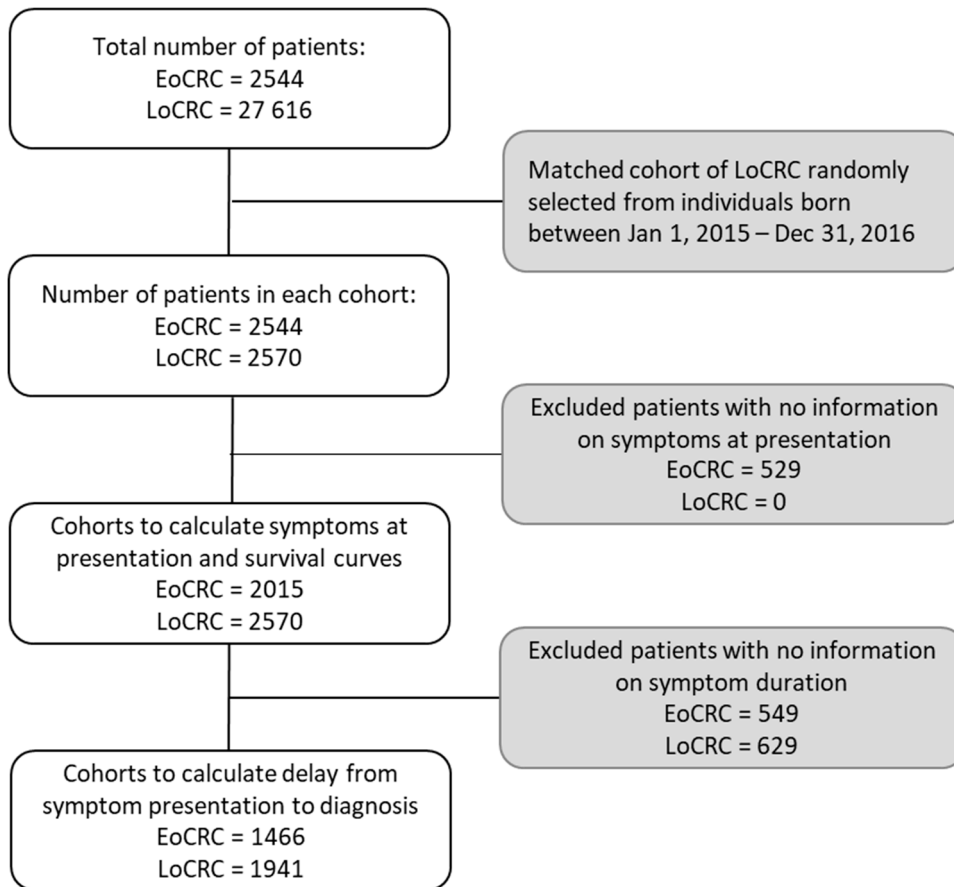

**Table S1. Demographic characteristics of all individuals  $\geq 50$  yo and a matched subset of the  $\geq 50$  yo cohort (LoCRC).**

| Characteristics                   | LoCRC (subset) |       | LoCRC (all) |      | p value |
|-----------------------------------|----------------|-------|-------------|------|---------|
|                                   | n              | %     | n           | %    |         |
| Sex                               |                |       |             |      |         |
| Male                              | 1474           | 57.4  | 15979       | 57.9 | 0.63    |
| Female                            | 1096           | 42.6  | 11637       | 42.1 |         |
| Median age at diagnosis (min-max) | 69 (50-104)    |       | 66 (50-104) |      | 0.23    |
| Diagnosis date                    |                |       |             |      |         |
| 1990-1994                         | 0              | 0.0   | 2126        | 8.5  | <0.0001 |
| 1995-1999                         | 0              | 0.0   | 2906        | 11.6 |         |
| 2000-2004                         | 0              | 0.0   | 4629        | 18.5 |         |
| 2005-2009                         | 0              | 0.0   | 5881        | 23.5 |         |
| 2010-2014                         | 1              | 0.0   | 6906        | 27.5 |         |
| 2015-2017                         | 2569           | 100.0 | 2624        | 10.5 |         |
| Clinical stage                    |                |       |             |      |         |
| 0                                 | 5              | 0.2   | 62          | 0.2  | <0.0001 |
| 1                                 | 83             | 3.2   | 610         | 2.4  |         |
| 2                                 | 736            | 28.6  | 7609        | 30.3 |         |
| 3                                 | 1087           | 42.3  | 9897        | 39.5 |         |
| 4                                 | 609            | 23.7  | 6030        | 24.1 |         |
| Unknown                           | 50             | 1.9   | 864         | 3.4  |         |
| Histology                         |                |       |             |      |         |
| Adenocarcinoma                    | 2523           | 98.2  | 24679       | 98.4 | 0.33    |
| Mucinous cell                     | 120            | 4.7   | 1478        | 6.0  |         |
| Signet cell                       | 21             | 0.8   | 150         | 0.6  |         |
| Other                             | 47             | 1.8   | 393         | 1.6  |         |

**Figure S2. Median survival of patients younger than 50 (EoCRC) and 50 years or older (LoCRC) by stage of cancer at presentation.** Kaplan Meyer curves of all EoCRC and LoCRC divided by Stage 1-3 and Stage 4 excluding stage 0 and undefined stage.

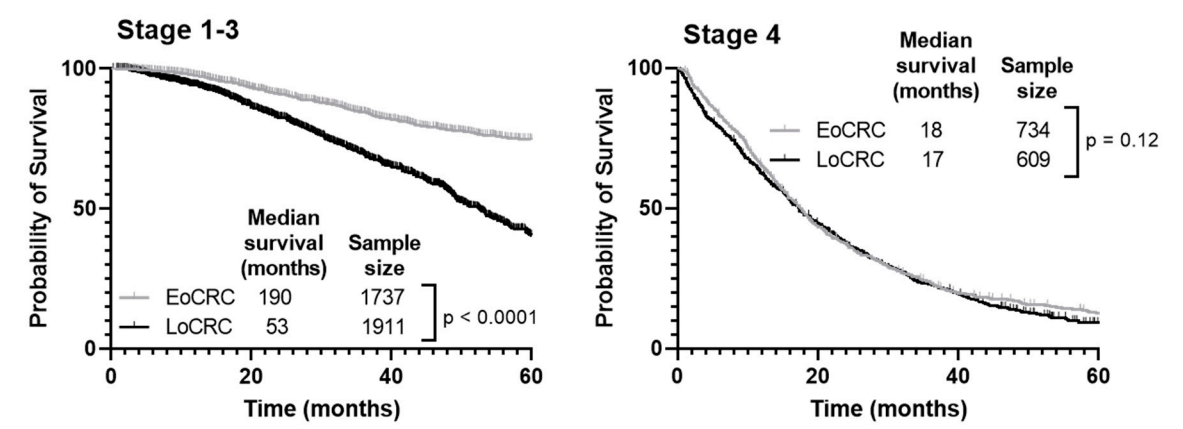

Figure S3. Disease free survival of patients with early-onset (patients under 50) and late-onset (patients 50 years or older) colorectal cancer by number of symptoms at presentation. Kaplan Meyer curves for EoCRC and LoCRC, all median survival values are undefined. Stage 0 and undefined stage excluded.

#### Early onset colorectal cancer

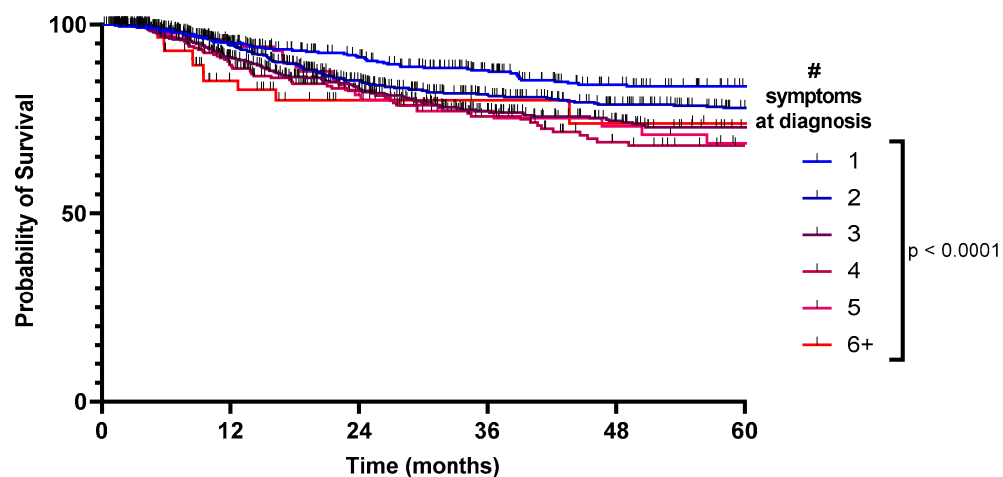

#### Late onset colorectal cancer

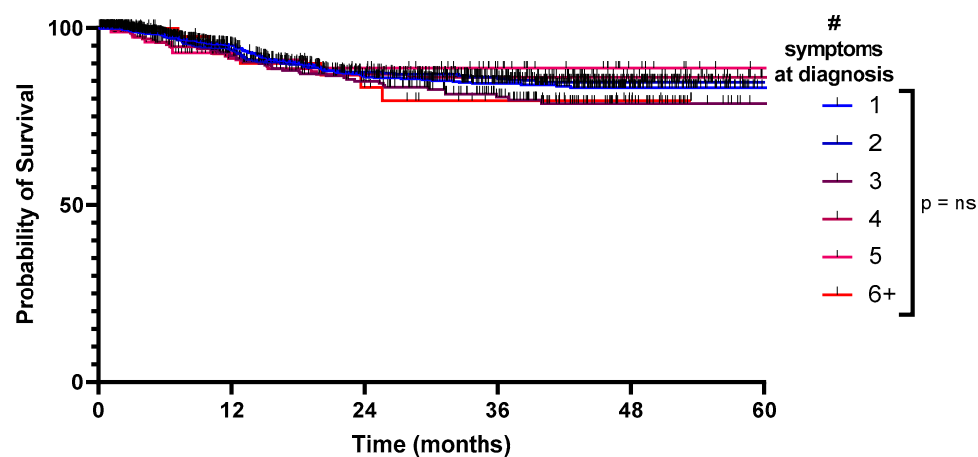

**Figure S4. Survival of patients with early-onset (patients under 50) and late-onset (patients 50 years or older) with colorectal cancer by number of symptoms at presentation, separated by stage of CRC at presentation.** Kaplan Meyer curves for EoCRC and LoCRC from Figure 3 are divided by either stage 1-3 or stage 4 CRC. Stage 0 and undefined stage excluded.

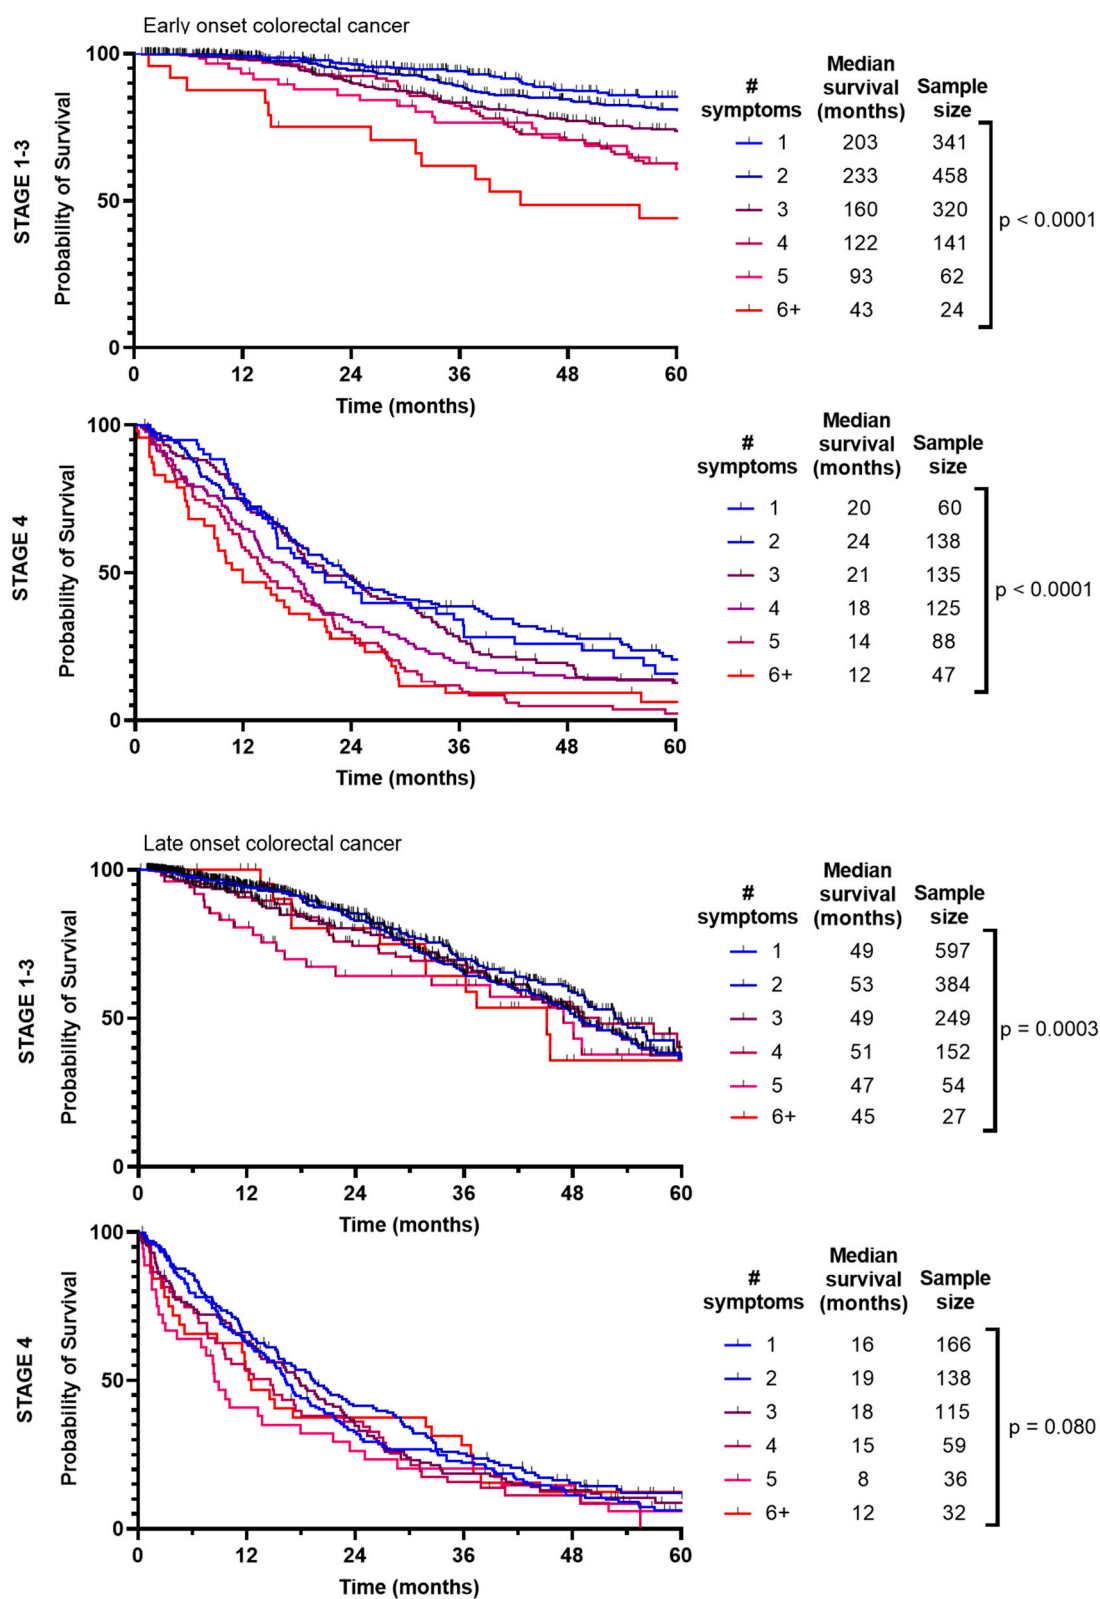

**Figure S5. Median survival of patients younger than 50 (EoCRC) and 50 years or older (LoCRC) by symptom number at presentation and stage of diagnosis of colorectal cancer.** Median survival calculated from Kaplan Meyer curves in Supplementary Figure 2, and p-value summarizes log-rank comparisons.

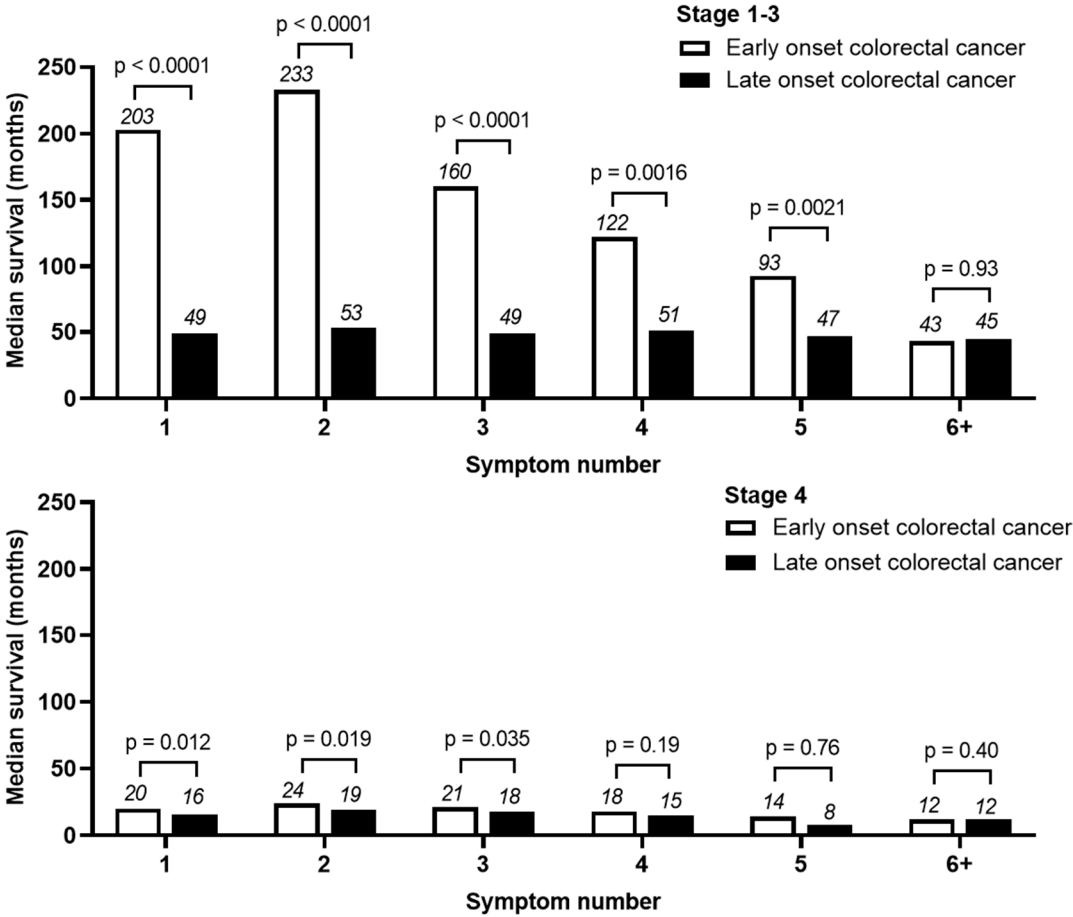

**Table S2. Multivariate analysis of the listed variables controlling for age, diagnosis era, stage at diagnosis, number of symptoms and duration of symptoms (categorical as 0-90, 91-180 and 181+ days). A total of 3344 patients with all available values were analyzed using a Cox-proportional hazard model.**

| <b>Variable</b>                 | <b>HR (95% CI)</b> | <b>P</b> |
|---------------------------------|--------------------|----------|
| Age<50                          | 0.87 (0.78-0.96)   | 0.008    |
| <b>Stage</b>                    |                    |          |
| Stage 1                         | 0.12 (0.066-0.23)  | <0.0001  |
| Stage 2                         | 0.11 (0.090-0.13)  | <0.001   |
| Stage 3                         | 0.25 (0.23-0.28)   | <0.001   |
| Stage 4                         | Reference          |          |
| <b>Total Number of Symptoms</b> |                    |          |
| 0                               | Reference          |          |
| 1                               | 1.48 (1.12-1.95)   | 0.006    |
| 2                               | 1.36 (1.027-1.80)  | 0.032    |
| 3                               | 1.68 (1.27-2.23)   | <0.0001  |
| 4                               | 1.93 (1.44-2.58)   | <0.0001  |
| 5                               | 2.51 (1.84-3.43)   | <0.0001  |
| 6                               | 2.36 (1.63-3.42)   | <0.0001  |
| 7                               | 2.31 (1.46-3.68)   | <0.0001  |
| 8                               | 9.02 (3.27-24.88)  | <0.0001  |
| 9                               | 5.20 (0.72-37.58)  | 0.1      |
